# Supplementary material for: GTPase domain driven dimerization of SEPT7 is dispensable for the critical role of septins in fibroblast cytokinesis
Source: PubMed Central journal article supplement (PMC4730212; doi:10.1038/srep20007), 2016-01-28
Supplement: srep20007-s1.pdf [file srep20007-s1.pdf]

**Supplementary data**  
(Supplementary Figures 1 - 3)

**GTPase domain driven dimerization of SEPT7 is dispensable  
for the critical role of septins in fibroblast cytokinesis**

**Megha Abbey<sup>1</sup>, Cosima Hakim<sup>1</sup>, Roopsee Anand<sup>2</sup>, Juri Lafera<sup>1</sup>, Axel Schambach<sup>3</sup>, Andreas Kispert<sup>4</sup>, Manuel H. Taft<sup>2</sup>, Volkhard Kaefer<sup>5, 6</sup>, Alexey Kotlyarov<sup>1</sup>, Matthias Gaestel<sup>1\*</sup>, and Manoj B. Menon<sup>1\*</sup>**

Institute of Physiological Chemistry<sup>1</sup>, Institute of Biophysical Chemistry<sup>2</sup>, Institute of Experimental Hematology<sup>3</sup>, Institute of Molecular Biology<sup>4</sup>, Institute of Pharmacology<sup>5</sup> & Research Core Unit Metabolomics<sup>6</sup>, Hannover Medical School, Hannover- 30625, Germany.

## Supplementary Figure 1

**A**

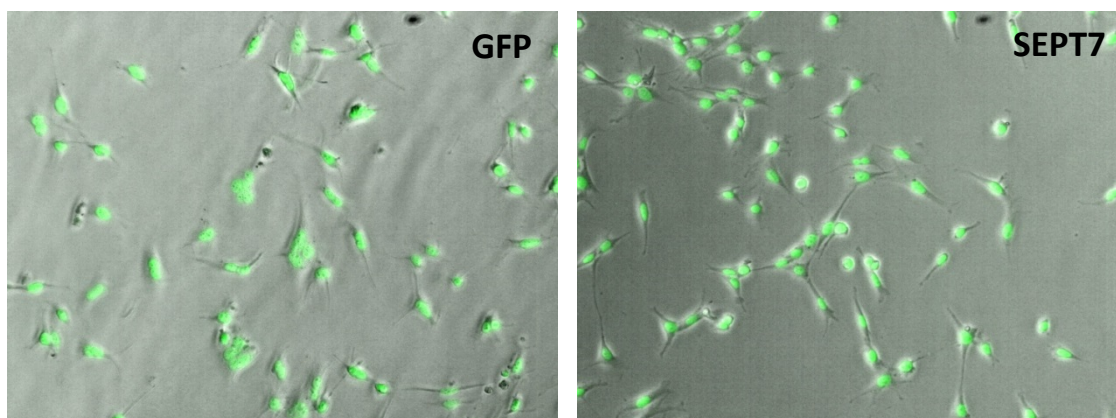

**B**

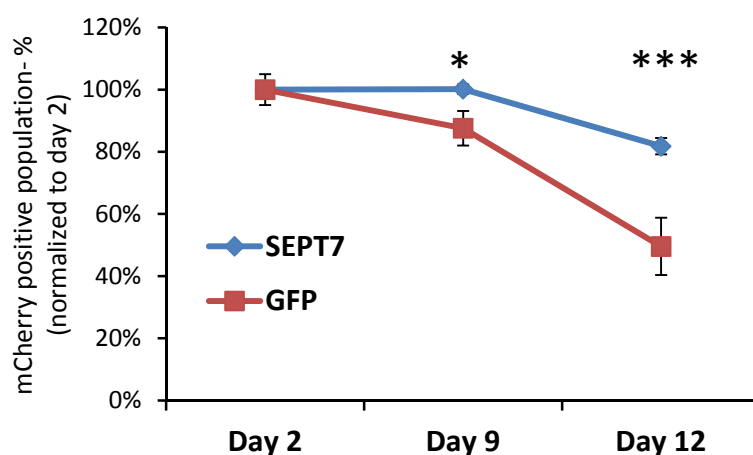

### Supplementary Figure 1. Verification of the Dox-inducible rescue model.

**A.** Representative images for data presented in Figure 1J. GFP or SEPT7-IRES GFP expressing cells were transduced with pRBid-Cre and cells were sorted 3 days later. The sorted GFP/mCherry double positive cells were fixed 3 days later and stained and imaged. 4x wells of each genotype were analyzed. **B.** In a parallel experiment, the loss of mCherry transduced cells were monitored in GFP or SEPT7 expressing cells by flow-cytometry (+Dox + Cre) as in Figure 1H. Triplicate analysis represented +/- SD shows the robustness of the assay (\* denotes a p value of 0.0505 & \*\*\* denotes a p value of 0.00055; t test, n= 3).

## Supplementary Figure 2

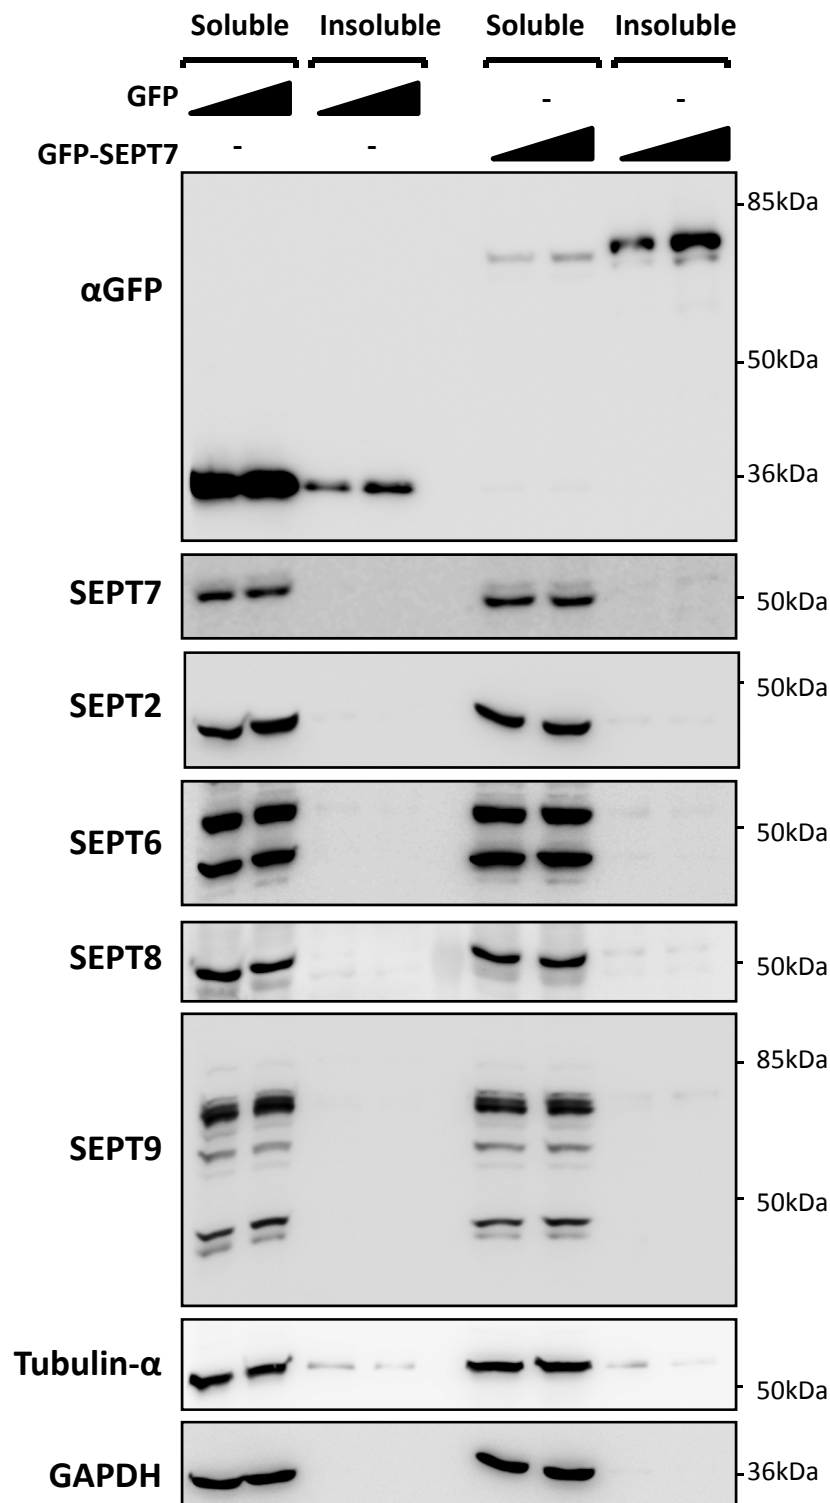

**Supplementary Figure 2. Over expressed GFP-SEPT7 forms insoluble homopolymers in HEK 293T cells.** GFP / GFP-SEPT7 transfected HEK 293T cells were fractionated into 1% triton soluble and insoluble fractions and equal volumes of lysates were analyzed by western blotting and probed with indicated antibodies. While GFP-SEPT7 is predominantly present in the insoluble fraction, GFP and all the other endogenous septins are in soluble fractions. GFP-SEPT7 has no effect on the solubility profile of endogenous septins, suggesting that the insoluble filaments are homo-polymeric and do not contain endogenous septins.

## Supplementary Figure 3

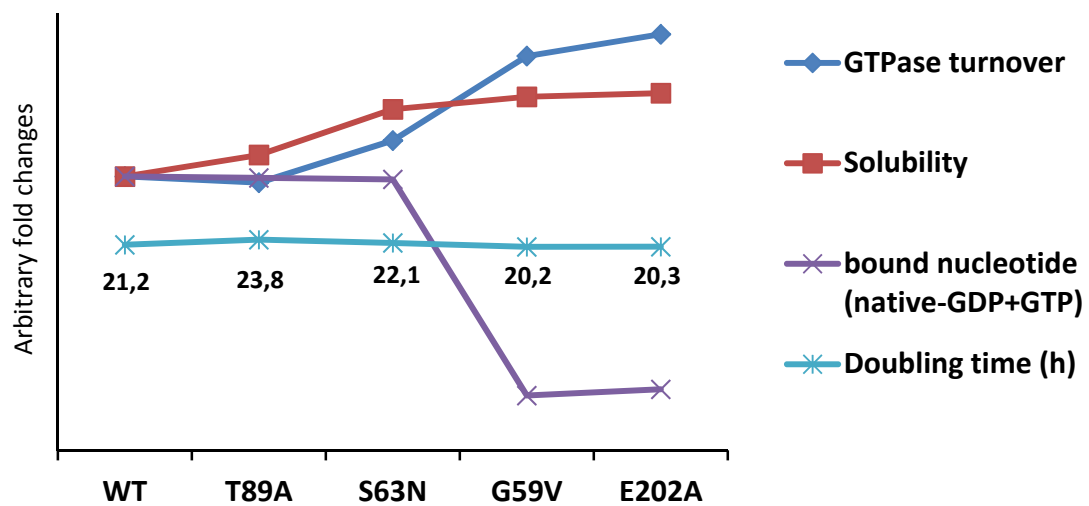

**Supplementary Figure 3. Effect of G-domain mutations on multiple parameters analyzed in the study.** When the *in-vitro* GTPase turnover (Fig. 4C) and nucleotide-binding (Fig. 4B) data is coupled to cell-based solubility assays (Fig. 3) and doubling time (Fig. 6E) of the rescued clones- there is a positive correlation between doubling time and nucleotide-binding and an inverse correlation between GTPase turnover/solubility versus nucleotide binding.
